# Supplementary material for: Dopamine-coated layered Co0.85Se as an efficient bifunctional oxygen electrocatalyst
Source: Royal Society of Chemistry journal article supplement (doi:10.1039/d2nj06167h), 2023-01-01
Supplement: d2nj06167h1.pdf [file d2nj06167h1.pdf]

## Supporting Information for

### **Dopamine coated layered Co<sub>0.85</sub>Se as an efficient bifunctional oxygen electrocatalyst**

Jin Li <sup>a</sup>, Yu Zhang <sup>a</sup>, Wenjie Wei <sup>a</sup>, Gaochao Fan<sup>a</sup>, Zumin Wang <sup>b, \*</sup>, Lingbo Zong <sup>a, \*</sup>,

Lei Wang <sup>a</sup>

*a, Key Laboratory of Eco-chemical Engineering, College of Chemistry and Molecular Engineering, Qingdao University of Science and Technology, Qingdao 266042, China*

*b, State Key Laboratory of Biochemical Engineering, Institute of Process Engineering, Chinese Academy of Sciences, 1 North 2nd Street, Zhongguancun, Haidian District, Beijing 100190, China*

*\* Corresponding authors.*

*E-mail addresses: wangzm@ipe.ac.cn*

*L. Zong: lingbozong@qust.edu.cn*

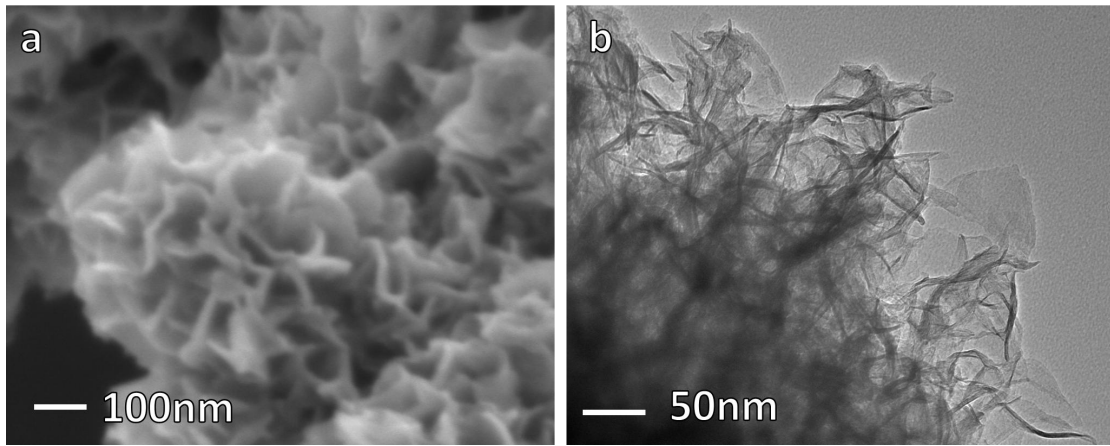

Fig. S1. (a) SEM and (b) TEM images of CoSe<sub>2</sub>.

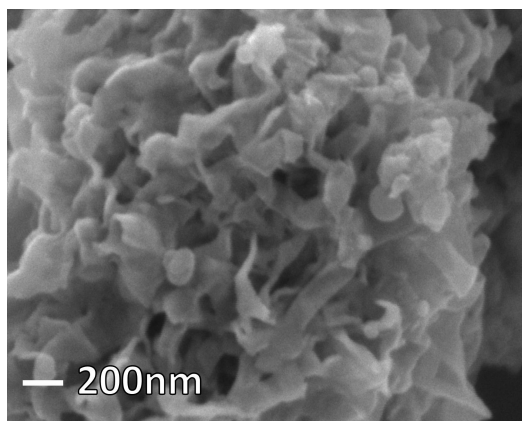

Fig. S2. SEM image of  $\text{CoSe}_2$  after dopamine coating.

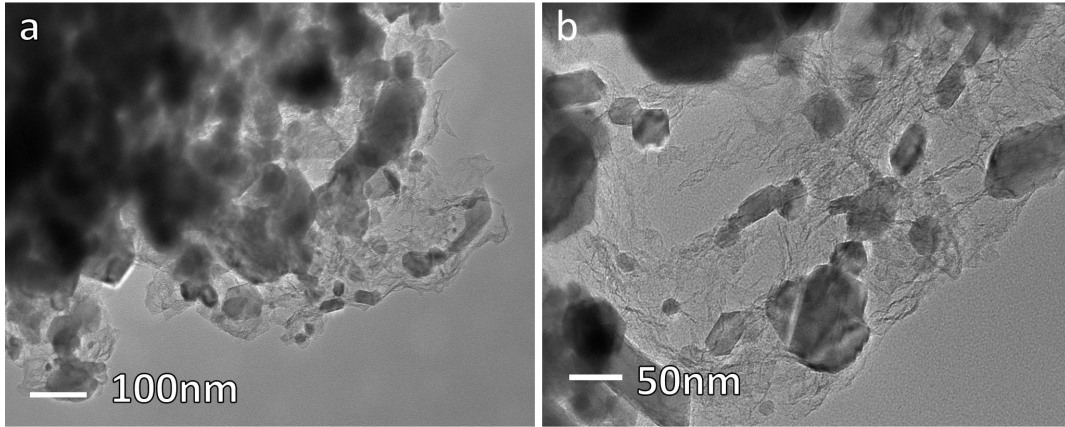

Fig. S3. (a, b) TEM images of  $\text{Co}_{0.85}\text{Se} @\text{NC}$ .

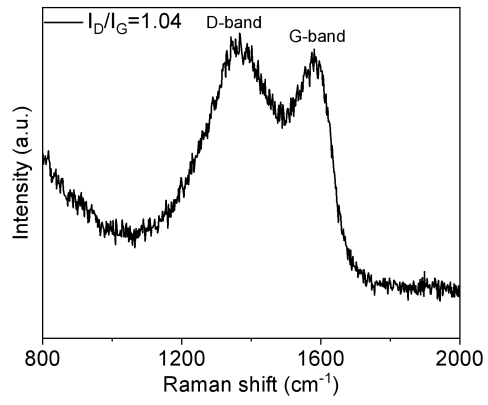

Fig. S4. Raman spectra of Co<sub>0.85</sub>Se@NC.

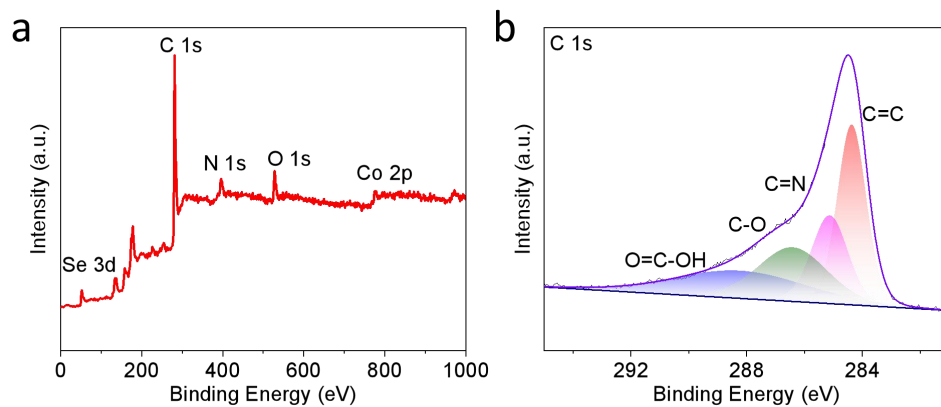

Fig. S5. (a) The survey XPS spectra and (b) high resolution C 1s XPS of  $\text{Co}_{0.85}\text{Se}$  @NC.

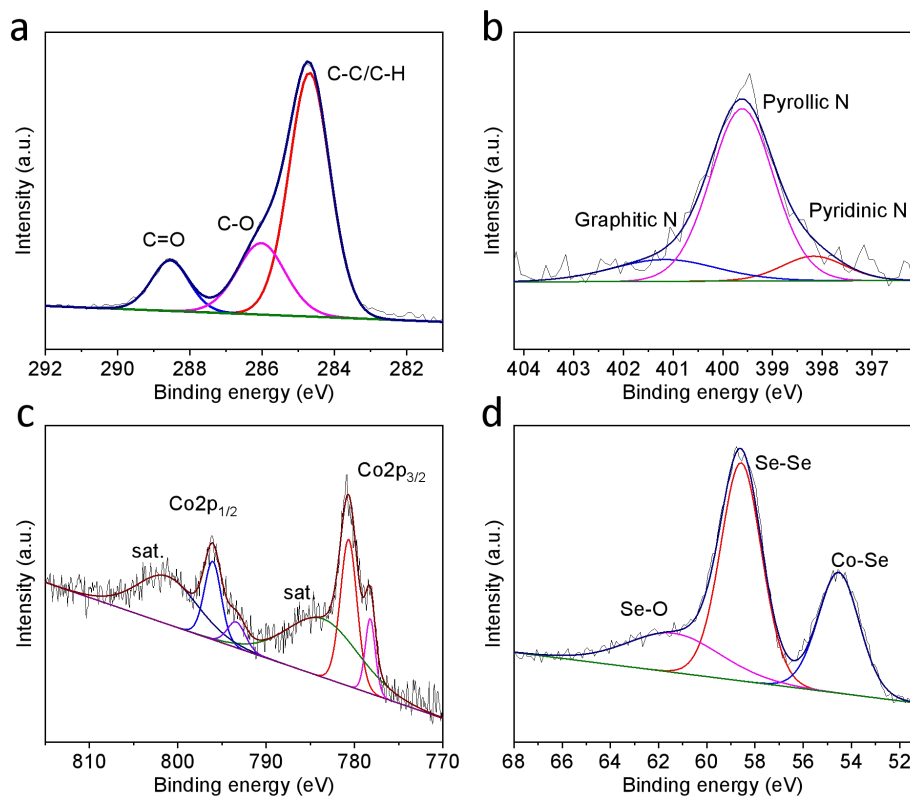

Fig. S6. High resolution (a) C 1s, (b) N 1s, (c) Co2p and (d) Se 3d XPS of CoSe<sub>2</sub>.

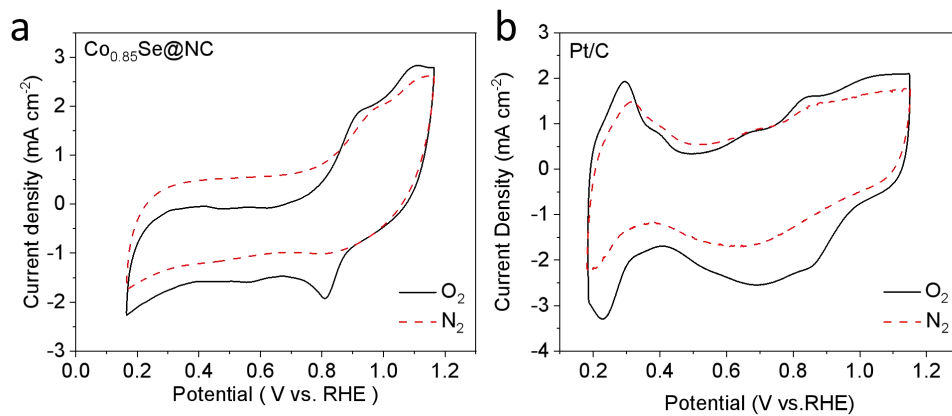

Fig. S7. (a) CV curves of Co<sub>0.85</sub>Se@NC and Pt/C performed in O<sub>2</sub>- and N<sub>2</sub>-saturated 0.1 M KOH electrolytes .



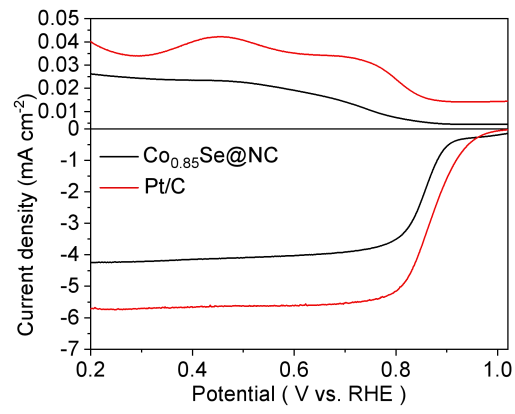

Fig. S8. Rotating ring disk electrode polarization curves of Co<sub>0.85</sub>Se@NC and Pt/C.

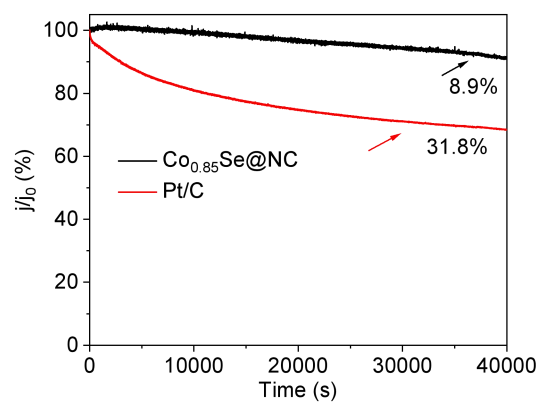

Fig. S9. Chronoamperometric (i-t) curves of Co<sub>0.85</sub>Se@NC and Pt/C under 0.8 V (vs.RHE) in 0.1 M KOH.

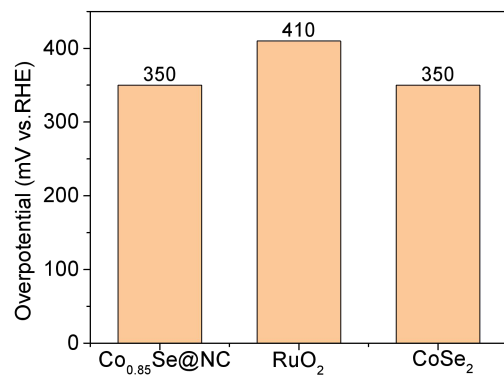

Fig. S10. Comparison of the over-potentials for Co<sub>0.85</sub>Se@NC, RuO<sub>2</sub> and CoSe<sub>2</sub> electrocatalysts at 10 mA cm<sup>-2</sup>.

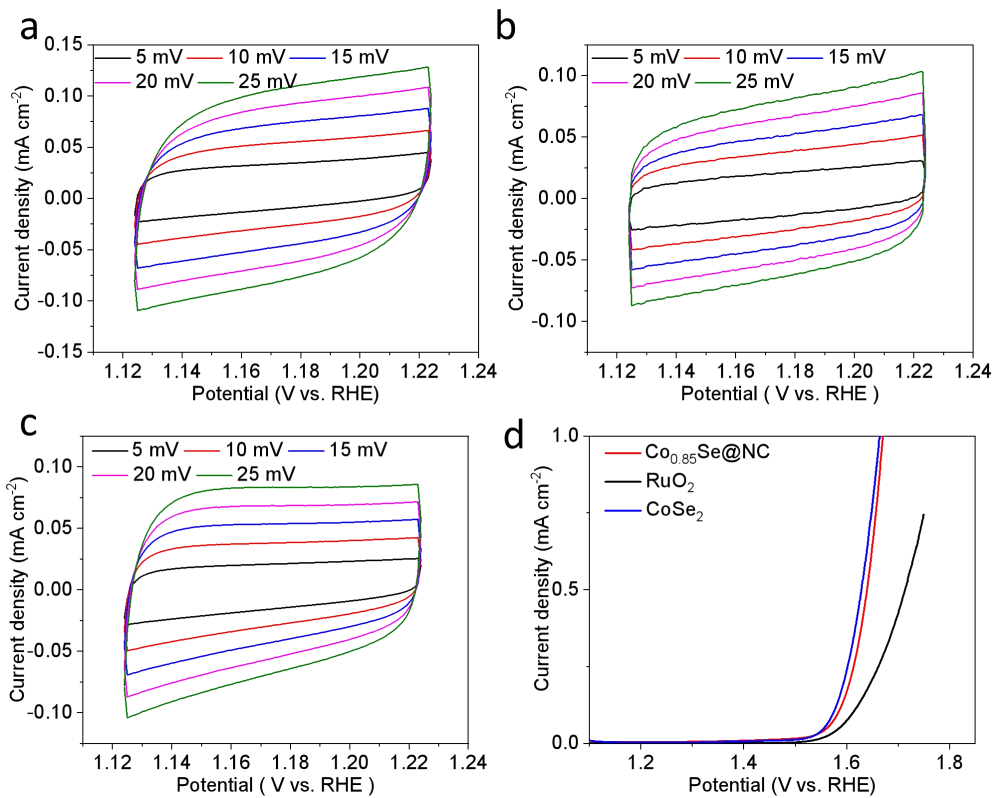

Fig. S11. The cyclic voltammograms (CVs) curves at different scan rates of (a)  $\text{Co}_{0.85}\text{Se@NC}$ , (b)  $\text{RuO}_2$  and (c)  $\text{CoSe}_2$ . (d) LSV curves of  $\text{Co}_{0.85}\text{Se@NC}$ ,  $\text{RuO}_2$  and  $\text{CoSe}_2$  normalized into ECSA.

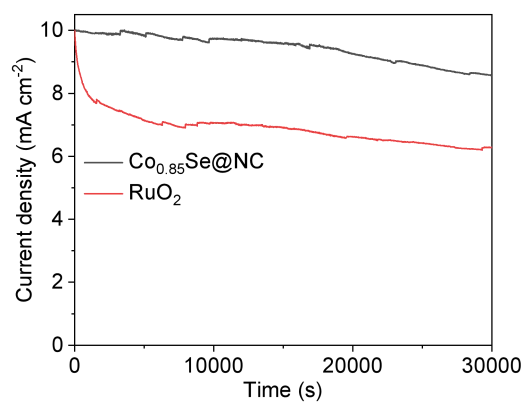

Fig. S12. Chronoamperometric (i-t) curves of Co<sub>0.85</sub>Se@NC and RuO<sub>2</sub> under 1.58 V (vs.RHE) in 1 M KOH.

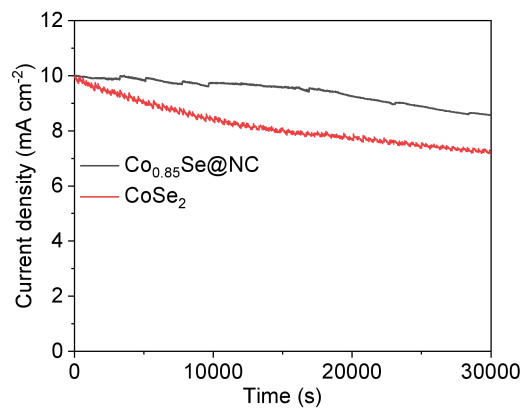

Fig. S13. Chronoamperometric (i-t) curves of Co<sub>0.85</sub>Se@NC and CoSe<sub>2</sub> under 1.58 V (vs.RHE) in 1 M KOH.

**Table S1.** Comparison of peak positions and peak area ratio of Co 2p of Co<sub>0.85</sub>Se@NC and CoSe<sub>2</sub>.

|                  |                   | Samples                  | Peak Position<br>(eV) | Peak Area<br>Ratio |
|------------------|-------------------|--------------------------|-----------------------|--------------------|
| Co <sup>2+</sup> | 2p <sub>1/2</sub> | Co <sub>0.85</sub> Se@NC | 793.5                 | 8.7 %              |
|                  |                   | CoSe <sub>2</sub>        | 793.4                 | 3.8 %              |
|                  | 2p <sub>3/2</sub> | Co <sub>0.85</sub> Se@NC | 777.8                 | 11.7 %             |
|                  |                   | CoSe <sub>2</sub>        | 778.2                 | 6.2 %              |
| Co <sup>3+</sup> | 2p <sub>1/2</sub> | Co <sub>0.85</sub> Se@NC | 796.7                 | 14.2 %             |
|                  |                   | CoSe <sub>2</sub>        | 796.1                 | 10.9 %             |
|                  | 2p <sub>3/2</sub> | Co <sub>0.85</sub> Se@NC | 780.5                 | 32.0 %             |
|                  |                   | CoSe <sub>2</sub>        | 780.7                 | 20.1 %             |

**Table S2.** Comparison of peak positions and peak area ratio of Se 3d of Co<sub>0.85</sub>Se@NC and CoSe<sub>2</sub>.

|       | Samples                  | Peak Position (eV) | Peak Area Ratio |
|-------|--------------------------|--------------------|-----------------|
| Co-Se | Co <sub>0.85</sub> Se@NC | 54.2               | 11.4 %          |
|       | CoSe <sub>2</sub>        | 54.5               | 28.4 %          |
| Se-Se | Co <sub>0.85</sub> Se@NC | 56.1               | 43.5 %          |
|       | CoSe <sub>2</sub>        | 58.6               | 50.8 %          |
| Se-O  | Co <sub>0.85</sub> Se@NC | 59.7               | 45.1 %          |
|       | CoSe <sub>2</sub>        | 61.4               | 20.8 %          |



Table S3. Comparison of ORR activity of Co<sub>0.85</sub>Se@NC with other ORR catalysts reported before.

| Catalyst                                | E <sub>onset</sub> (V vs.RHE) | E <sub>1/2</sub> (V vs.RHE) | References |
|-----------------------------------------|-------------------------------|-----------------------------|------------|
| Co <sub>0.85</sub> Se@NC                | 1.0                           | 0.85                        | This work  |
| Co-N-C SA/HCF                           | 0.928 V                       | 0.801 V                     | 1          |
| NBCNT-10                                | 0.958 V                       | 0.82 V                      | 2          |
| 3DOM P-Co <sub>3</sub> O <sub>4-δ</sub> | 0.99 V                        | 0.82 V                      | 3          |
| Co-pyridinic N-C                        | 0.99 V                        | 0.87 V                      | 4          |
| PCN-226(Co)                             | 0.83 V                        | 0.75V                       | 5          |
| Co <sub>1</sub> -N <sub>3</sub> PS/HC   | 1.00 V                        | 0.92V                       | 6          |
| ZIF-L-Zn@ZIF-67                         | -                             | 0.86V                       | 7          |
| CoSe <sub>2</sub> @NC                   | 0.904 V                       | 0.83 V                      | 8          |
| MnSe@MWCNT                              | 0.94 V                        | 0.86V                       | 9          |
| W <sub>2</sub> N/WC                     | 0.93V                         | 0.81V                       | 10         |
| Fe <sub>3</sub> C-Co/NC                 | 0.94V                         | 0.885V                      | 11         |
| NiFe@C@Co<br>CNFs                       | 0.974V                        | 0.87V                       | 12         |
| RuCoOx                                  | -                             | 0.855V                      | 13         |
| Co/Fe/Mo/NC                             | 0.96V                         | 0.84V                       | 14         |
| Fe <sub>2</sub> N@BNC-2                 | 0.981V                        | 0.844V                      | 15         |
| 2% Ru-NCO                               | -                             | 0.88V                       | 16         |

Table S4. Comparison of OER activity of Co<sub>0.85</sub>Se@NC with other catalysts reported before.

| Catalyst                                   | Overpotential/mV<br>(10 mA cm <sup>-2</sup> ) | Electrolyte | References |
|--------------------------------------------|-----------------------------------------------|-------------|------------|
| Co <sub>0.85</sub> Se@NC                   | 350                                           | 1 MKOH      | This work  |
| CoSe <sub>2</sub> <sup>(400)</sup> -NC-800 | 360                                           | 1 MKOH      | 17         |
| Ni-Co-S/NF                                 | 391                                           | 1 MKOH      | 18         |
| CoPPi nanowires                            | 359                                           | 1 MKOH      | 19         |
| Ni-Fe-S/rGO                                | 366                                           | 1 MKOH      | 20         |
| CoS <sub>x</sub> @CuMoS <sub>4</sub>       | 351.4                                         | 1 MKOH      | 21         |
| CuCo <sub>3</sub> S <sub>2</sub> /CC       | 346                                           | 1 MKOH      | 22         |
| CS@N-CT                                    | 350                                           | 1 MKOH      | 23         |
| CoSe <sub>2</sub> @NC                      | 340                                           | 1 MKOH      | 8          |
| Ir/pyrrolic-N <sub>4</sub> -G              | 320                                           | 1 MKOH      | 24         |
| NiFe@C@Co<br>CNFs                          | 336                                           | 1 MKOH      | 12         |
| D-Co@NC                                    | 488                                           | 0.1 MKOH    | 25         |
| CoNi@CoCN                                  | 340                                           | 1 MKOH      | 26         |

## References

1. J. Lei, H. Liu, D. Yin, L. Zhou, J. A. Liu, Q. Chen, X. Cui, R. He, T. Duan and W. Zhu, *Small*, 2020, **16**, e1905920.
2. P. Wei, X. Li, Z. He, X. Sun, Q. Liang, Z. Wang, C. Fang, Q. Li, H. Yang, J. Han and Y. Huang, *Chem. Eng. J.*, 2021, **422**.
3. D. Wang, Y.-P. Deng, Y. Zhang, Y. Zhao, G. Zhou, L. Shui, Y. Hu, M. Shakouri, X. Wang and Z. Chen, *Energy Storage Mater.*, 2021, **41**, 427-435.
4. Y. Ha, B. Fei, X. Yan, H. Xu, Z. Chen, L. Shi, M. Fu, W. Xu and R. Wu, *Adv. Energy Mater.*, 2020, **10**.
5. M. O. Cichocka, Z. Liang, D. Feng, S. Back, S. Siahrostami, X. Wang, L. Samperisi, Y. Sun, H. Xu, N. Hedin, H. Zheng, X. Zou, H. C. Zhou and Z. Huang, *J. Am. Chem. Soc.*, 2020, **142**, 15386-15395.
6. Y. Chen, R. Gao, S. Ji, H. Li, K. Tang, P. Jiang, H. Hu, Z. Zhang, H. Hao, Q. Qu, X. Liang, W. Chen, J. Dong, D. Wang and Y. Li, *Angew. Chem. Int. Ed.*, 2021, **60**, 3212-3221.
7. M. Huo, T. Sun, Y. Wang, P. Sun, J. Dang, B. Wang, N. V. R. A. Dharanipragada, A. K. Inge, W. Zhang, R. Cao, Y. Ma and H. Zheng, *J. Mater. Chem. A*, 2022, **10**, 10408-10416.
8. K. Ding, J. Hu, J. Luo, W. Jin, L. Zhao, L. Zheng, W. Yan, B. Weng, H. Hou and X. Ji, *Nano Energy*, 2022, **91**.
9. H. Singh, M. Marley-Hines, S. Chakravarty and M. Nath, *Journal of Materials Chemistry A*, 2022, **10**, 6772-6784.
10. J. Diao, Y. Qiu, S. Liu, W. Wang, K. Chen, H. Li, W. Yuan, Y. Qu and X. Guo, *Adv. Mater.*, 2020, **32**, e1905679.
11. C. C. Yang, S. F. Zai, Y. T. Zhou, L. Du and Q. Jiang, *Adv. Funct. Mater.*, 2019, DOI: 10.1002/adfm.201901949.
12. X. Chen, J. Pu, X. Hu, Y. Yao, Y. Dou, J. Jiang and W. Zhang, *Small*, 2022, **18**, e2200578.
13. C. Zhou, S. Zhao, H. Meng, Y. Han, Q. Jiang, B. Wang, X. Shi, W. Zhang, L. Zhang and R. Zhang, *Nano Lett.*, 2021, **21**, 9633-9641.
14. S. Li, J. Zhang, Z. Liu, T. Wang, R. Guo, Z. Yang, Y. A. Wu, W. Xu and S. Pan, *Chem. Eng. J.*, 2022, **446**.
15. Z. Xie, Q. Li, X. Peng, X. Wang, L. Guo, X. Zhang, Z. Lu, X. Yang, X. Yu and L. Li, *J. Mater. Chem. A*, 2022, **10**, 4191-4199.
16. J. Zhang, J. Lian, Q. Jiang and G. Wang, *Chem. Eng. J.*, 2022, **439**.
17. H. Lu, Y. Zhang, Y. Huang, C. Zhang and T. Liu, *ACS Appl. Mater. Interf.*, 2019, **11**, 3372-3381.
18. Y. Gong, Z. Xu, H. Pan, Y. Lin, Z. Yang and J. Wang, *J. Mater. Chem. A*, 2018, **6**, 12506-12514.
19. H. Du, W. Ai, Z. L. Zhao, Y. Chen, X. Xu, C. Zou, L. Wu, L. Su, K. Nan, T. Yu and C. M. Li, *Small*, 2018, DOI: 10.1002/sml.201801068, e1801068.
20. B. Wang, Y. Chen, X. Wang, J. Ramkumar, X. Zhang, B. Yu, D. Yang, M. Karpuraranjith and W. Zhang, *J. Mater. Chem. A*, 2020, **8**, 13558-13571.
21. D. C. Nguyen, D. T. Tran, T. L. L. Doan, D. H. Kim, N. H. Kim and J. H. Lee,

- Adv. Energy Mater.*, 2020, **10**.
22. C. Mahala, R. Sharma, M. D. Sharma and S. Pande, *ChemElectroChem*, 2019, **6**, 5301-5312.
  23. J. Li, G. Liu, B. Liu, Z. Min, D. Qian, J. Jiang and J. Li, *Electrochim. Acta*, 2018, **265**, 577-585.
  24. X. Li, Z. Su, Z. Zhao, Q. Cai, Y. Li and J. Zhao, *J. Colloid Interf. Sci.*, 2022, **607**, 1005-1013.
  25. F. Zhang, L. Chen, H. Yang, Y. Zhang, Y. Peng, X. Luo, A. Ahmad, N. Ramzan, Y. Xu and Y. Shi, *Chem. Eng. J.*, 2022, **431**.
  26. Y.-L. Zhang, Y.-K. Dai, B. Liu, X.-F. Gong, L. Zhao, F. Cheng, J.-J. Cai, Q.-Y. Zhou, B. Liu and Z.-B. Wang, *J. Mater. Chem. A*, 2022, **10**, 3112-3121.
